# Supplementary material for: Tuning the surface oxygen concentration of {111} surrounded ceria nanocrystals for enhanced photocatalytic activities
Source: Royal Society of Chemistry journal article supplement (doi:10.1039/c5nr06588g), 2015-11-16
Supplement: c5nr06588g1.pdf [file c5nr06588g1.pdf]

## Tuning Surface Oxygen Concentration of {111} Surrounded Ceria Nanocrystals for Enhanced Photocatalytic Activity

Adnan Younis\*, Dewei Chu\*, Yusuf Valentino Kaneti and Sean Li

*School of Materials Science and Engineering, University of New South Wales, Sydney, 2052,  
NSW, Australia*

\*Corresponding Author: Tel.: +61 (0)2 9385 0763; Fax: +61 (0)2 9385 6565

E-mail address: [a.younis@unsw.edu.au](mailto:a.younis@unsw.edu.au), [d.chu@unsw.edu.au](mailto:d.chu@unsw.edu.au)

### Supporting Information

Table-1:

| Indium doping concentration (wt. %) | 2-Theta | Lattice parameter(nm) | d-spacing (nm) | Crystalline size (nm) |
|-------------------------------------|---------|-----------------------|----------------|-----------------------|
| 0                                   | 28.287  | 0.541                 | 0.3146         | 5.812                 |
| 5                                   | 28.344  | 0.537                 | 0.312          | 5.295                 |
| 10                                  | 28.362  | 0.529                 | 0.309          | 5.142                 |
| 15                                  | 28.415  | 0.520                 | 0.307          | 5.061                 |

The calculated crystallite size by Scherrer formula in equation (1) decreased with increasing the indium content with the size was about 5–6 nm.

$$D = k\lambda / \beta \cos\theta \quad (1)$$

In this equation,  $k$  is a constant equal to 0.89,  $\lambda$  is the X-ray wavelength equal to 0.154 nm,  $\beta$  is the full width at half maximum, and  $\theta$  is the half diffraction angle.

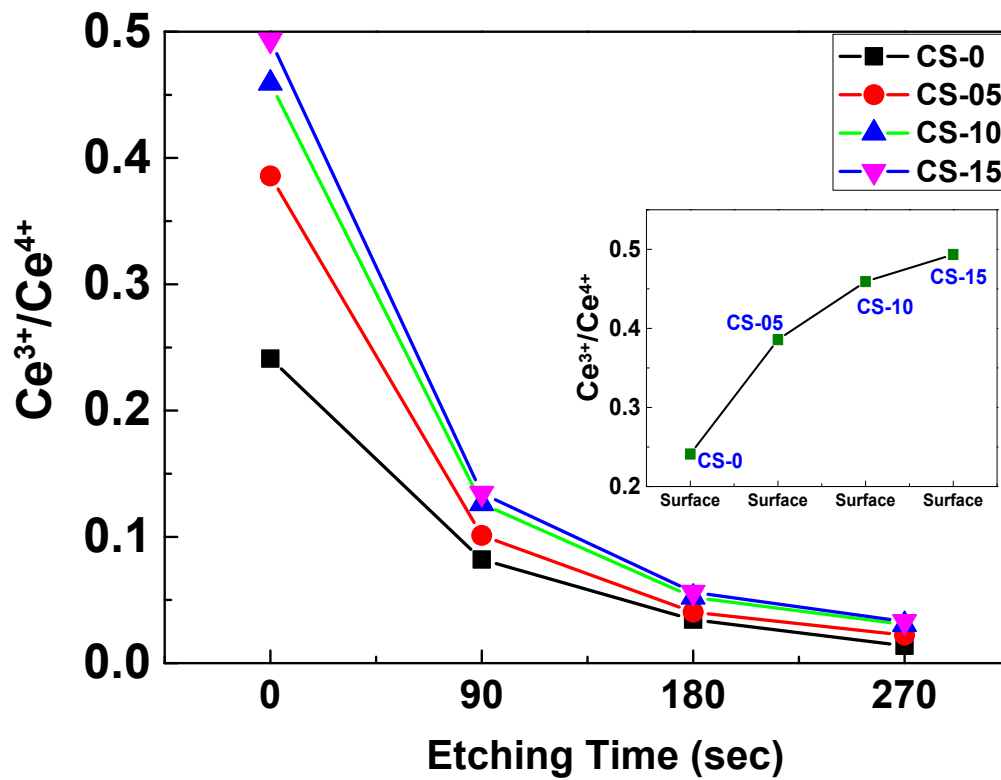

**Figure S1:** Variations in  $Ce^{3+}/Ce^{4+}$  ratios of un doped and doped  $CeO_2$  extracted from XPS data with respect to etching time by using 3keV Ar ion beam

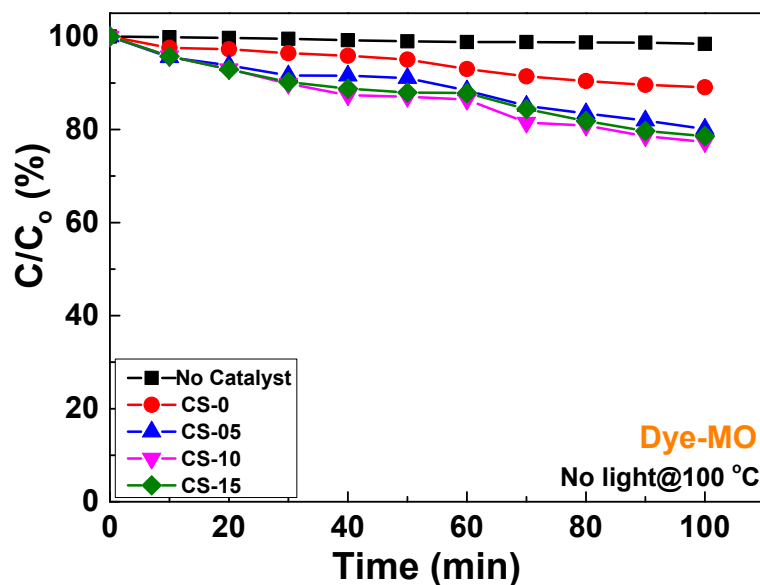

**Figure S2:** Thermocatalytic performances of all samples (doped and undoped CeO<sub>2</sub> nanocrystals) under dark conditions.

The rate constant at room temperature is denoted as  $\kappa_p$ , while the rate constants for thermocatalytic reactions (only at high temperature without any radiation) and photothermocatalytic reactions (with visible and UV light radiations and at high temperatures) are denoted as  $\kappa_t$  and  $\kappa_{tp}$ , respectively as shown in figure S3.

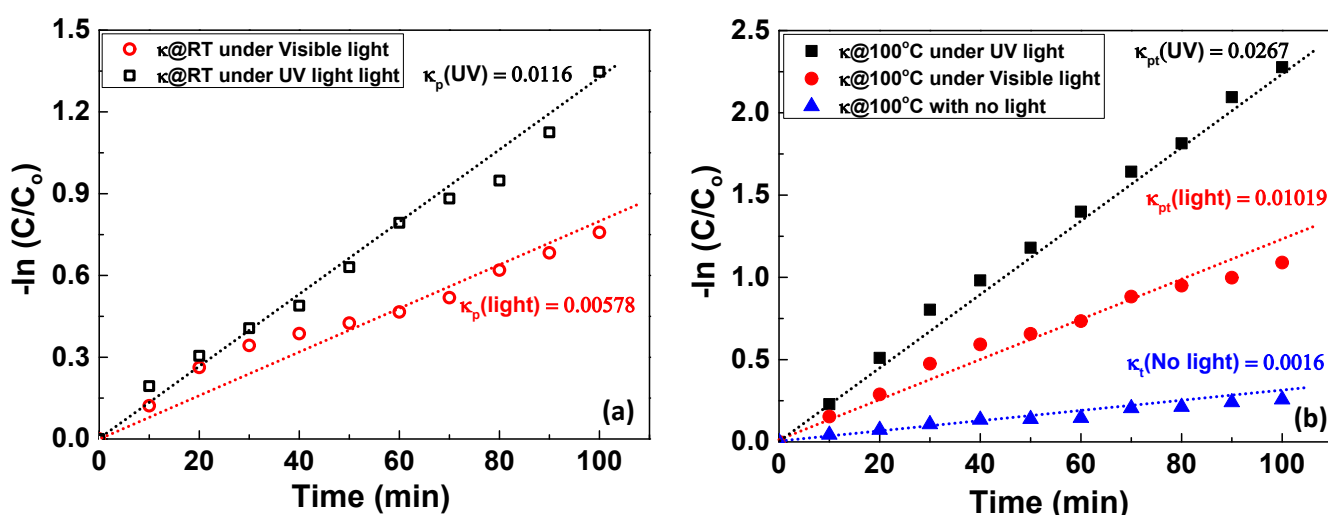

**Figure S3:** Plot of rate constants for Photocatalytic Degradation of MO (a) at Room Temperature (b) Thermocatalytic Degradation at 100 °C, and Photo-thermocatalytic Degradation at 100 °C of CS-10 sample.

If the photo-thermocatalytic reaction is assumed to be due to the photocatalytic degradation in parallel with the thermocatalytic degradation that proceeds independently, then, the rate of dye decolourization would be equal to the sum of  $\kappa_t$  and  $\kappa_p$ . However, by analysing rate constant results carefully, the  $\kappa_{tp}$  under UV light radiation and visible light radiation are almost 2.1 and 1.7 times higher than the sum of  $\kappa_t$  and  $\kappa_p$ . This further confirms the efficient electron hole separation at elevated temperatures due to the mobility of oxygen ions leading to a synergistic effect for the dye degradation.

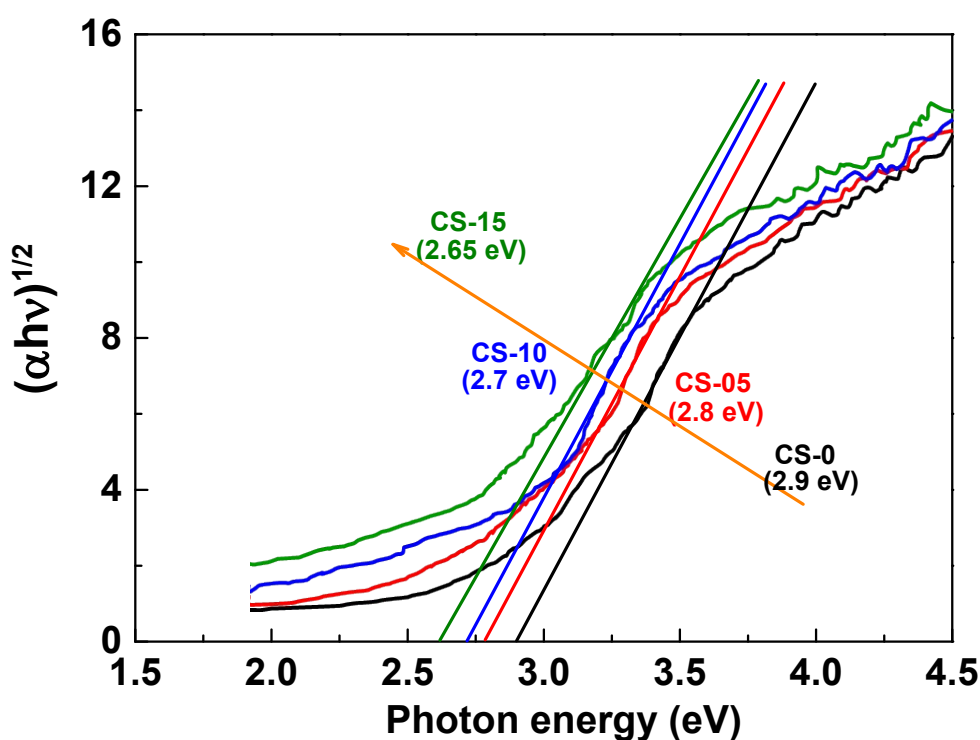

**Figure S4:** Schuster-Kubelka-Munk absorption function of In-doped CeO<sub>2</sub> samples with x-intercept showing the band gap energies.
